# Supplementary material for: Inanspruchnahme der Notfallversorgung im Nordwesten Deutschlands
Source: Springer Nature journal article supplement (doi:10.1007/s10049-022-01083-z), 2022-10-06
Supplement: MOESM1 [file 10049_2022_1083_MOESM1_ESM.pdf]

Zusatzmaterial zum Beitrag „Inanspruchnahme der Notfallversorgung im Nordwesten Deutschlands“ von **Seeger I, Thate S, Ansmann L und Lubasch JS (2022) in *Notfall+Rettenungsmedizin***

Beitrag und Zusatzmaterial stehen Ihnen auf [www.springermedizin.de](http://www.springermedizin.de) zur Verfügung. Bitte geben Sie dort den Beitragstitel in die Suche ein.

## Angaben Fragebogen

|                                                                                                                                                                                     |                |
|-------------------------------------------------------------------------------------------------------------------------------------------------------------------------------------|----------------|
| <b>Soziodemografische Daten</b>                                                                                                                                                     |                |
| Geschlecht, Alter, höchster Schulabschluss                                                                                                                                          | Einfachauswahl |
| <b>Häufigkeit Kontakt zum Rettungsdienst/ärztlichen Bereitschaftsdienst aufgrund eines Notfalls in den Jahren 2018 - 2020</b>                                                       |                |
| gar nicht<br>einmal<br>2 - 3- mal<br>4 - 5- mal<br>6- mal und mehr                                                                                                                  | Einfachauswahl |
| <b>Wenn ja (einmal und mehr): erforderliche Hilfe erhalten?</b>                                                                                                                     |                |
| Ja/Nein                                                                                                                                                                             | Einfachauswahl |
| <b>Häufigkeit Aufsuchen Notaufnahme in den Jahren 2018 - 2020</b>                                                                                                                   |                |
| gar nicht<br>einmal<br>2 - 3- mal<br>4 - 5- mal<br>6- mal und mehr                                                                                                                  | Einfachauswahl |
| <b>Wenn ja (einmal und mehr): erforderliche Hilfe erhalten?</b>                                                                                                                     |                |
| Ja/Nein                                                                                                                                                                             | Einfachauswahl |
| <b>Wenn ja (einmal und mehr): Aufsuchen der Notaufnahme</b>                                                                                                                         |                |
| Aus eigener Initiative, auf Anraten des ärztlichen Bereitschaftsdienstes, mit der Einweisung/Überweisung der Hausarzt-/Facharztpraxis, nach Kontakt zur Notrufnummer 112, sonstiges | Einfachauswahl |
| <b>Fallbeispiel 1: akute Schwierigkeiten, Lähmungen auf einer Körperseite, medizinische Hilfe wird benötigt: An wen wenden Sie sich?</b>                                            |                |
| Hausarztpraxis, ärztlicher Bereitschaftsdienst, Krankenhaus-Notaufnahme, Notrufnummer 112, Sonstiges                                                                                | Einfachauswahl |
| <b>Fallbeispiel 2: Samstagnachmittag, Hausarztpraxis geschlossen, seit einigen Tagen Erkältungssymptome, medizinische Hilfe wird benötigt: An wen wenden Sie sich?</b>              |                |
| Ärztlicher Bereitschaftsdienst, Krankenhaus-Notaufnahme, Notrufnummer 112, Sonstiges                                                                                                | Einfachauswahl |
| <b>Dauer Anfahrt Notfalleinrichtung, wenn Hausarztpraxis geschlossen ist (Samstagnachmittag)</b>                                                                                    |                |
| Bis 15 Minuten, bis 30 Minuten, bis 45 Minuten, 45 Minuten und länger                                                                                                               | Einfachauswahl |
| <b>Nutzung von Telefon oder Video vorstellbar, um im Notfall eine erste ärztliche Beratung zu erhalten?</b>                                                                         |                |
| Ja/Nein                                                                                                                                                                             | Einfachauswahl |
| <b>Wie lautet die Nummer des ärztlichen Bereitschaftsdienstes?</b>                                                                                                                  |                |
| Freitextfeld                                                                                                                                                                        |                |
