# Supplementary material for: Inanspruchnahme der Notfallversorgung im Nordwesten Deutschlands
Source: Springer Nature journal article supplement (doi:10.1007/s10049-022-01083-z), 2022-10-06
Supplement: MOESM2 [file 10049_2022_1083_MOESM2_ESM.pdf]

Zusatzmaterial zum Beitrag „Inanspruchnahme der Notfallversorgung im Nordwesten Deutschlands“ von Seeger I, Thate S, Ansmann L und Lubasch JS (2022) in *Notfall+Rettenungsmedizin*

Beitrag und Zusatzmaterial stehen Ihnen auf [www.springermedizin.de](http://www.springermedizin.de) zur Verfügung. Bitte geben Sie dort den Beitragstitel in die Suche ein.

## Geschlechtsspezifische Unterschiede

|                                                      | Gesamt        | männlich       | weiblich       | p-Wert<br>(Korrelations-<br>koeffizient) |
|------------------------------------------------------|---------------|----------------|----------------|------------------------------------------|
|                                                      | n=4.018; 100% | n=1.513; 37,7% | n=2.505; 62,3% |                                          |
| Kontakt mit Rettungsdienst                           | 3.992         | 1.506          | 2.486          | 0,838 <sup>a</sup>                       |
| Gar nicht                                            | 84,9%         | 84,9%          | 84,9%          |                                          |
| 1x                                                   | 10,4%         | 10,1%          | 10,7%          |                                          |
| 2 – 3x                                               | 3,5%          | 3,7%           | 3,4%           |                                          |
| 4x und mehr                                          | 1,2%          | 1,3%           | 1,1%           |                                          |
| <i>Wenn ja: erforderliche Hilfe erhalten?</i>        | 502           | 187            | 315            | 0,007                                    |
| Ja                                                   | 93,6%         | 89,8%          | 95,9%          | (0,119) <sup>b</sup>                     |
| Nein                                                 | 6,8%          | 10,2%          | 4,1%           |                                          |
| Kontakt mit dem Ärztlichen Bereitschaftsdienst       | 3.973         | 1.497          | 2.476          | 0,014 <sup>a</sup>                       |
| Gar nicht                                            | 81,9%         | 84,4%          | 80,4%          |                                          |
| 1x                                                   | 11,8%         | 10,2%          | 12,8%          |                                          |
| 2 – 3x                                               | 5,4%          | 4,7%           | 5,8%           |                                          |
| 4x und mehr                                          | 0,9%          | 0,7%           | 1,1%           |                                          |
| <i>Wenn ja: erforderliche Hilfe erhalten?</i>        | 578           | 179            | 399            | 0,233                                    |
| Ja                                                   | 87,9%         | 85,5%          | 89,0%          | (0,05) <sup>b</sup>                      |
| Nein                                                 | 12,1%         | 14,5%          | 11,0%          |                                          |
| Aufsuchen Notaufnahme                                | 3.985         | 1.499          | 2.486          | 0,026 <sup>a</sup>                       |
| Gar nicht                                            | 72,4%         | 74,4%          | 71,3%          |                                          |
| 1x                                                   | 18,9%         | 18,5%          | 19,1%          |                                          |
| 2 – 3x                                               | 7,7%          | 6,1%           | 8,7%           |                                          |
| 4x und mehr                                          | 1,0%          | 0,9%           | 1,0%           |                                          |
| <i>Wenn ja: erforderliche Hilfe erhalten?</i>        | 1.016         | 372            | 644            | 0,296                                    |
| Ja                                                   | 92,0%         | 90,9%          | 92,7%          | (0,033) <sup>b</sup>                     |
| Nein                                                 | 8,0%          | 9,1%           | 7,3%           |                                          |
| <i>Aufsuchen Notaufnahme Eigeninitiative/ÜW/EW*?</i> | 1.016         | 372            | 644            | 0,511                                    |
| Eigeninitiative                                      | 59,8%         | 62,4%          | 58,4%          | (0,136) <sup>b</sup>                     |
| Anraten Bereitschaftsdienstpraxis                    | 9,0%          | 8,3%           | 9,3%           |                                          |
| Einweisung/Überweisung Haus-/Facharzt                | 16,7%         | 15,3%          | 17,5%          |                                          |
| nach Kontakt zur 112                                 | 14,7%         | 11,8%          | 16,3%          |                                          |
| sonstiges                                            | 3,2%          | 2,7%           | 3,6%           |                                          |

|                                               |       |       |       |                              |
|-----------------------------------------------|-------|-------|-------|------------------------------|
| Medizinische Hilfe bei Schlaganfall-Symptomen | 3.992 | 1.504 | 2.488 | 0,004                        |
| Hausarztpraxis                                | 13,2% | 11,9% | 15,4% | (0,063) <sup>b</sup>         |
| Ärztlicher Bereitschaftsdienst                | 6,8%  | 7,4%  | 5,7%  |                              |
| Krankenhaus-Notaufnahme                       | 15,2% | 14,8% | 15,7% |                              |
| Notrufnummer 112                              | 63,8% | 64,6% | 62,5% |                              |
| Sonstiges                                     | 1,1%  | 1,2%  | 0,7%  |                              |
| Medizinische Hilfe bei Erkältungssymptomen    | 3.954 | 1.490 | 2.464 | <b>&lt;0,001</b>             |
| Ärztlicher Bereitschaftsdienst                | 75,2% | 73,0% | 76,5% | (0,075) <sup>b</sup>         |
| Krankenhaus-Notaufnahme                       | 10,0% | 12,3% | 8,6%  |                              |
| Notrufnummer 112                              | 5,2%  | 6,2%  | 4,6%  |                              |
| Sonstiges                                     | 9,6%  | 8,5%  | 10,3% |                              |
| Mögliche Anfahrt Notfalleinrichtung (Dauer)   | 3.944 | 1.490 | 2.454 | 0,038 <sup>a</sup>           |
| bis 15 Minuten                                | 32,0% | 31,5% | 32,2% |                              |
| bis 30 Minuten                                | 53,4% | 52,3% | 54,1% |                              |
| bis 45 Minuten                                | 7,1%  | 7,1%  | 7,1%  |                              |
| 45 Minuten und länger                         | 7,5%  | 9,1%  | 6,6%  |                              |
| Nutzung Telefon oder Video im Notfall         | 3.855 | 1.460 | 1.505 | 0,001                        |
| Ja                                            | 76,4% | 79,2% | 74,7% | (0,052) <sup>c</sup>         |
| Nein                                          | 23,6% | 20,8% | 25,3% |                              |
| Nummer Ärztlicher Bereitschaftsdienst         | 4.018 | 1.513 | 2.505 | <b>&lt;0,001<sup>a</sup></b> |
| Keine Angaben                                 | 45,6% | 51,4% | 42,1% |                              |
| Nummer falsch angegeben                       | 19,0% | 20,6% | 18,1% |                              |
| Nummer richtig angegeben                      | 35,4% | 28,0% | 39,8% |                              |

---

\*ÜW = Überweisung, EW = Einweisung

<sup>a</sup> Chi-Quadrat-Test

<sup>b</sup> Spearman

<sup>c</sup> Kramer Phi

## Altersabhängige Unterschiede

|                                               | Gesamt          | 18- 29 Jahre | 30 – 39 Jahre | 40 – 49 Jahre | 50 – 59 Jahre | 60 – 69 Jahre | 70 – 79 Jahre | 80 Jahre +  | p-Wert<br>(Korrelations-<br>koeffizient) |
|-----------------------------------------------|-----------------|--------------|---------------|---------------|---------------|---------------|---------------|-------------|------------------------------------------|
|                                               | (n=4.057; 100%) | n=943; 23,2% | n=680; 16,8%  | n=592; 14,6%  | n=818; 20,2%  | n=347; 8,6%   | n=297; 7,3%   | n=380; 9,3% |                                          |
| <b>Kontakt mit Rettungsdienst</b>             | 4.029           | 936          | 676           | 591           | 813           | 345           | 296           | 372         | 0,437                                    |
| Gar nicht                                     | 84,9%           | 83,4%        | 85,7%         | 85,8%         | 87,1%         | 93,0%         | 86,1%         | 72,3%       | (0,12) <sup>b</sup>                      |
| 1x                                            | 10,5%           | 11,8%        | 9,8%          | 9,5%          | 9,7%          | 4,1%          | 11,1%         | 17,5%       |                                          |
| 2 – 3x                                        | 3,5%            | 3,3%         | 4,0%          | 3,0%          | 2,0%          | 1,7%          | 2,4%          | 9,4%        |                                          |
| 4x und mehr                                   | 1,1%            | 1,5%         | 0,6%          | 1,7%          | 1,2%          | 1,2%          | 0,3%          | 0,8%        |                                          |
| <i>Wenn ja: erforderliche Hilfe erhalten?</i> | 506             | 127          | 92            | 61            | 91            | 21            | 31            | 83          | 0,949 <sup>a</sup>                       |
| Ja                                            | 93,7%           | 92,1%        | 93,5%         | 93,4%         | 93,4%         | 95,2%         | 93,5%         | 96,4%       |                                          |
| Nein                                          | 6,3%            | 7,9%         | 6,5%          | 6,6%          | 6,6%          | 4,8%          | 6,5%          | 3,6%        |                                          |
| <b>Kontakt mit Ärztl. Bereitschaftsdienst</b> | 4.011           | 939          | 677           | 591           | 808           | 338           | 290           | 368         | <b>&lt;0,001</b>                         |
| Gar nicht                                     | 91,9%           | 77,6%        | 76,5%         | 83,2%         | 84,0%         | 90,2%         | 90,7%         | 81,9%       | (-0,093) <sup>b</sup>                    |
| 1x                                            | 11,8%           | 14,6%        | 15,8%         | 9,1%          | 11,1%         | 6,8%          | 5,9%          | 12,8%       |                                          |
| 2 – 3x                                        | 5,4%            | 6,5%         | 6,9%          | 6,1%          | 4,0%          | 2,4%          | 3,1%          | 6,0%        |                                          |
| 4x und mehr                                   | 0,9%            | 1,3%         | 0,7%          | 1,5%          | 0,9%          | 0,6%          | 0,3%          | 0,3%        |                                          |
| <i>Wenn ja: erforderliche Hilfe erhalten?</i> | 584             | 173          | 135           | 69            | 111           | 19            | 22            | 55          | 0,439 <sup>a</sup>                       |
| Ja                                            | 88,0%           | 88,4%        | 85,2%         | 88,4%         | 85,6%         | 100,0%        | 95,5%         | 90,9%       |                                          |
| Nein                                          | 12,0%           | 11,6%        | 14,8%         | 11,6%         | 14,4%         | 0,0%          | 4,5%          | 9,1%        |                                          |
| <b>Aufsuchen Notaufnahme</b>                  | 4.021           | 938          | 677           | 590           | 810           | 346           | 293           | 367         | <b>&lt;0,001</b>                         |
| Gar nicht                                     | 72,5%           | 65,8%        | 71,3%         | 75,6%         | 75,3%         | 79,5%         | 78,8%         | 69,5%       | (-0,076) <sup>b</sup>                    |
| 1x                                            | 18,9%           | 21,4%        | 20,4%         | 17,6%         | 19,5%         | 13,0%         | 14,0%         | 19,3%       |                                          |
| 2 – 3x                                        | 7,7%            | 10,6%        | 7,5%          | 6,8%          | 4,6%          | 6,9%          | 6,5%          | 10,4%       |                                          |
| 4x und mehr                                   | 0,9%            | 2,2%         | 0,7%          | 0,0%          | 0,6%          | 0,6%          | 0,7%          | 0,8%        |                                          |

|                                               |       |       |       |       |       |       |       |       |                              |
|-----------------------------------------------|-------|-------|-------|-------|-------|-------|-------|-------|------------------------------|
| <i>Wenn ja: erforderliche Hilfe erhalten?</i> | 1.021 | 305   | 188   | 128   | 179   | 60    | 53    | 108   | 0,443 <sup>a</sup>           |
| Ja                                            | 92,2% | 93,1% | 91,0% | 93,8% | 93,3% | 91,7% | 94,3% | 87,0% |                              |
| Nein                                          | 7,8%  | 6,9%  | 9,0%  | 6,3%  | 6,7%  | 8,3%  | 5,7%  | 13,0% |                              |
| <i>Aufsuchen Notaufnahme EI/ÜW/EW*?</i>       | 1.021 | 305   | 188   | 128   | 179   | 60    | 53    | 108   | <b>&lt;0,001<sup>a</sup></b> |
| Eigeninitiative                               | 58,0% | 72,1% | 63,3% | 59,4% | 55,3% | 60,0% | 13,2% | 32,4% |                              |
| Anraten Bereitschaftsdienstpraxis             | 9,0%  | 6,2%  | 11,2% | 8,6%  | 10,1% | 6,7%  | 7,5%  | 13,9% |                              |
| Einweisung/Überweisung HA/FA                  | 16,7% | 13,4% | 15,4% | 15,6% | 14,5% | 16,7% | 26,4% | 27,8% |                              |
| nach Kontakt zur 112                          | 14,8% | 13,8% | 9,6%  | 11,7% | 17,9% | 10,0% | 17,0% | 26,9% |                              |
| sonstiges                                     | 3,2%  | 2,6%  | 2,7%  | 2,3%  | 3,4%  | 6,7%  | 5,7%  | 3,7%  |                              |
| <i>Mediz. Hilfe Schlaganfall-Symptome</i>     | 4.026 | 939   | 676   | 587   | 814   | 343   | 291   | 376   | <b>&lt;0,001<sup>a</sup></b> |
| Hausarztpraxis                                | 13,3% | 11,5% | 10,5% | 9,0%  | 9,8%  | 12,8% | 20,3% | 31,6% |                              |
| Ärztlicher Bereitschaftsdienst                | 6,7%  | 5,2%  | 4,9%  | 6,6%  | 7,6%  | 10,5% | 8,2%  | 7,4%  |                              |
| Krankenhaus-Notaufnahme                       | 15,3% | 20,0% | 16,4% | 14,0% | 13,0% | 16,6% | 13,7% | 8,2%  |                              |
| Notrufnummer 112                              | 63,7% | 63,2% | 67,6% | 69,0% | 68,8% | 58,6% | 57,0% | 48,7% |                              |
| Sonstiges                                     | 0,1%  | 0,1%  | 0,6%  | 1,4%  | 0,7%  | 1,5%  | 0,7%  | 4,0%  |                              |
| <i>Mediz. Hilfe Erkältungssymptome</i>        | 3989  | 934   | 673   | 585   | 811   | 339   | 288   | 359   | <b>&lt;0,001<sup>a</sup></b> |
| Ärztlicher Bereitschaftsdienst                | 75,2% | 74,2% | 76,2% | 79,1% | 78,3% | 74,0% | 73,6% | 64,3% |                              |
| Krankenhaus-Notaufnahme                       | 10,0% | 11,7% | 9,1%  | 9,1%  | 8,1%  | 12,1% | 10,1% | 10,6% |                              |
| Notrufnummer 112                              | 5,4%  | 3,9%  | 3,7%  | 2,9%  | 3,3%  | 4,1%  | 12,2% | 16,7% |                              |
| Sonstiges                                     | 9,5%  | 10,3% | 11,0% | 8,9%  | 10,2% | 9,7%  | 4,2%  | 8,4%  |                              |
| <i>Mögl. Anfahrt Notfalleinrichtung</i>       | 3.980 | 931   | 674   | 583   | 809   | 340   | 291   | 352   | <b>&lt;0,001</b>             |
| bis 15 Minuten                                | 32,0% | 20,7% | 28,3% | 33,8% | 34,0% | 38,5% | 50,2% | 40,1% | <b>(-0,149)<sup>b</sup></b>  |
| bis 30 Minuten                                | 53,4% | 55,6% | 55,2% | 53,2% | 50,8% | 52,1% | 48,5% | 54,5% |                              |
| bis 45 Minuten                                | 7,2%  | 12,1% | 7,7%  | 4,5%  | 8,0%  | 5,6%  | 0,7%  | 2,8%  |                              |
| 45 Minuten und länger                         | 7,5%  | 11,5% | 8,8%  | 8,6%  | 7,2%  | 3,8%  | 0,7%  | 2,6%  |                              |

|                                     |       |       |       |       |       |       |       |       |                              |
|-------------------------------------|-------|-------|-------|-------|-------|-------|-------|-------|------------------------------|
| Nutzung Telefon o. Video im Notfall | 3890  | 926   | 661   | 569   | 780   | 324   | 278   | 352   | <b>&lt;0,001<sup>a</sup></b> |
| Ja                                  | 76,4% | 79,8% | 79,6% | 77,2% | 77,3% | 71,3% | 78,4% | 61,4% |                              |
| Nein                                | 23,6% | 20,2% | 20,4% | 22,8% | 22,7% | 28,7% | 21,6% | 38,6% |                              |
| Nummer Ärztl. Bereitschaftsdienst   | 4.013 | 943   | 680   | 592   | 818   | 347   | 307   | 380   | <b>&lt;0,001</b>             |
| Keine Angaben                       | 45,6% | 48,9% | 40,9% | 41,4% | 42,5% | 48,7% | 52,4% | 54,2% | <b>(-0072)<sup>b</sup></b>   |
| Nummer falsch angegeben             | 19,0% | 17,5% | 16,3% | 18,4% | 17,1% | 16,1% | 27,7% | 27,1% |                              |
| Nummer korrekt angegeben            | 35,4% | 33,6% | 42,8% | 40,2% | 40,3% | 35,2% | 19,9% | 18,7% |                              |

\*EI = Eigeninitiative, ÜW = Überweisung, EW = Einweisung

<sup>a</sup> Chi-Quadrat-Test

<sup>b</sup> Spearman

## Bildungsabhängige Unterschiede

|                                               | Gesamt          | Niedriger<br>Schulabschluss | Mittlerer<br>Schulabschluss | Hoher<br>Schulabschluss | p-Wert<br>(Korrelations-<br>koeffizient) |
|-----------------------------------------------|-----------------|-----------------------------|-----------------------------|-------------------------|------------------------------------------|
|                                               | (n=4.013; 100%) | (n=489; 12,2%)              | (n=1.404; 35,0%)            | (n=2.120; 52,8%)        |                                          |
| Kontakt mit Rettungsdienst                    | 3.986           | 483                         | 1.394                       | 2.109                   | <b>&lt;0,001</b>                         |
| Gar nicht                                     | 84,9%           | 79,3%                       | 83,6%                       | 87,0%                   | (-0,73) <sup>b</sup>                     |
| 1x                                            | 10,5%           | 12,2%                       | 11,2%                       | 9,6%                    |                                          |
| 2 – 3x                                        | 3,5%            | 7,2%                        | 3,4%                        | 2,7%                    |                                          |
| 4x und mehr                                   | 1,2%            | 1,2%                        | 1,8%                        | 0,7%                    |                                          |
| <i>Wenn ja: erforderliche Hilfe erhalten?</i> | 501             | 76                          | 188                         | 237                     | 0,015 <sup>a</sup>                       |
| Ja                                            | 94,0%           | 86,8%                       | 94,7%                       | 95,8%                   |                                          |
| Nein                                          | 6,0%            | 13,2%                       | 5,3%                        | 4,2%                    |                                          |
| Kontakt mit Ärztl. Bereitschaftsdienst        | 3.968           | 475                         | 1.388                       | 2.105                   | 0,322                                    |
| Gar nicht                                     | 81,9%           | 80,2%                       | 81,8%                       | 82,3%                   | (-0,016) <sup>b</sup>                    |
| 1x                                            | 11,8%           | 11,6%                       | 12,1%                       | 11,7%                   |                                          |
| 2 – 3x                                        | 5,4%            | 7,6%                        | 5,0%                        | 5,2%                    |                                          |
| 4x und mehr                                   | 0,9%            | 0,6%                        | 1,2%                        | 0,9%                    |                                          |
| <i>Wenn ja: erforderliche Hilfe erhalten?</i> | 579             | 74                          | 202                         | 303                     | 0,097 <sup>a</sup>                       |
| Ja                                            | 88,1%           | 81,1%                       | 90,6%                       | 88,1%                   |                                          |
| Nein                                          | 11,9%           | 18,9%                       | 9,4%                        | 11,9%                   |                                          |
| Aufsuchen Notaufnahme                         | 3.978           | 480                         | 1.390                       | 2.108                   | 0,031                                    |
| Gar nicht                                     | 72,5%           | 71,7%                       | 70,9%                       | 73,8%                   | (-0,034) <sup>b</sup>                    |
| 1x                                            | 18,9%           | 16,0%                       | 20,0%                       | 18,8%                   |                                          |
| 2 – 3x                                        | 7,6%            | 10,8%                       | 7,9%                        | 6,6%                    |                                          |
| 4x und mehr                                   | 1,0%            | 1,5%                        | 1,2%                        | 0,7%                    |                                          |
| <i>Wenn ja: erforderliche Hilfe erhalten?</i> | 1.011           | 128                         | 366                         | 517                     | <b>&lt;0,001<sup>a</sup></b>             |
| Ja                                            | 92,4%           | 81,3%                       | 93,2%                       | 94,6%                   |                                          |
| Nein                                          | 7,6%            | 18,8%                       | 6,8%                        | 5,4%                    |                                          |
| <i>Aufsuchen Notaufnahme EI/ÜW/EW*?</i>       | 1.011           | 128                         | 366                         | 517                     | <b>&lt;0,001<sup>a</sup></b>             |
| Eigeninitiative                               | 59,9%           | 40,6%                       | 59,0%                       | 65,4%                   |                                          |
| Anraten Bereitschaftsdienstpraxis             | 9,0%            | 12,5%                       | 6,3%                        | 10,1%                   |                                          |
| Einweisung/Überweisung HA/FA                  | 16,7%           | 18,8%                       | 19,1%                       | 14,5%                   |                                          |
| nach Kontakt zur 112                          | 13,8%           | 19,5%                       | 15,3%                       | 11,4%                   |                                          |
| sonstiges                                     | 3,3%            | 4,7%                        | 3,6%                        | 2,7%                    |                                          |
| Mediz. Hilfe Schlaganfall-Symptome            | 3.987           | 480                         | 1.396                       | 2.111                   | <b>&lt;0,001<sup>a</sup></b>             |
| Hausarztpraxis                                | 13,1%           | 25,2%                       | 13,4%                       | 10,2%                   |                                          |
| Ärztlicher Bereitschaftsdienst                | 6,7%            | 8,1%                        | 5,7%                        | 7,0%                    |                                          |
| Krankenhaus-Notaufnahme                       | 15,3%           | 12,7%                       | 14,3%                       | 16,6%                   |                                          |
| Notrufnummer 112                              | 63,9%           | 52,5%                       | 65,5%                       | 65,3%                   |                                          |
| Sonstiges                                     | 1,0%            | 1,5%                        | 1,1%                        | 0,9%                    |                                          |

|                                          |       |       |       |       |                      |
|------------------------------------------|-------|-------|-------|-------|----------------------|
| Mediz. Hilfe bei Erkältungssymptomen     | 3.954 | 467   | 1.383 | 2.104 | <0,001 <sup>a</sup>  |
| Ärztlicher Bereitschaftsdienst           | 75,2% | 70,2% | 77,4% | 74,8% |                      |
| Krankenhaus-Notaufnahme                  | 9,9%  | 12,4% | 8,9%  | 10,1% |                      |
| Notrufnummer 112                         | 5,3%  | 12,4% | 4,4%  | 4,3%  |                      |
| Sonstiges                                | 9,6%  | 4,9%  | 9,3%  | 10,8% |                      |
| Mögl. Anfahrt Notfalleinrichtung (Dauer) | 3.942 | 469   | 1.376 | 2.097 | <0,001 <sup>a</sup>  |
| bis 15 Minuten                           | 31,9% | 42,4% | 32,1% | 29,3% | (0,070) <sup>b</sup> |
| bis 30 Minuten                           | 53,4% | 50,1% | 53,3% | 54,2% |                      |
| bis 45 Minuten                           | 7,2%  | 3,4%  | 7,6%  | 7,9%  |                      |
| 45 Minuten und länger                    | 7,5%  | 4,1%  | 7,0%  | 8,6%  |                      |
| Nutzung Telefon oder Video im Notfall    | 3.858 | 456   | 1.343 | 2.059 | <0,001 <sup>a</sup>  |
| Ja                                       | 76,7% | 59,2% | 73,2% | 82,9% |                      |
| Nein                                     | 23,3% | 40,8% | 26,8% | 17,1% |                      |
| Nummer Ärztlicher Bereitschaftsdienst    | 4.013 | 489   | 1.404 | 2.120 | 0,108                |
| Keine Angaben                            | 35,4% | 24,7% | 42,3% | 33,2% | (0,025) <sup>b</sup> |
| Nummer falsch angegeben                  | 19,0% | 18,2% | 16,0% | 21,2% |                      |
| Nummer korrekt angegeben                 | 45,6% | 57,1% | 41,7% | 45,6% |                      |

\*EI = Eigeninitiative, ÜW = Überweisung, EW = Einweisung

<sup>a</sup> Chi-Quadrat-Test

<sup>b</sup> Spearman

## Bevölkerungsart gesamt und stratifiziert nach medizinischen Vorkenntnissen

|                                                      | Gesamt        | Allgemeine Bevölkerung | Medizinisch-pflegerisches Personal | p-Wert (Korrelationskoeffizient) |
|------------------------------------------------------|---------------|------------------------|------------------------------------|----------------------------------|
|                                                      | n=4.073; 100% | n=2.509; 61,6%         | n=1.564; 38,4%                     |                                  |
| Kontakt mit Rettungsdienst                           | 4.045         | 2.488                  | 1.557                              | <b>&lt;0,001<sup>a</sup></b>     |
| Gar nicht                                            | 84,9%         | 83,8%                  | 86,6%                              |                                  |
| 1x                                                   | 10,5%         | 11,5%                  | 8,8%                               |                                  |
| 2 – 3x                                               | 3,5%          | 4,1%                   | 2,6%                               |                                  |
| 4x und mehr                                          | 1,1%          | 0,6%                   | 2,0%                               |                                  |
| <i>Wenn ja: erforderliche Hilfe erhalten?</i>        | 509           | 335                    | 174                                | 0,158                            |
| Ja                                                   | 93,5%         | 94,6%                  | 91,4%                              | (0,062) <sup>b</sup>             |
| Nein                                                 | 6,5%          | 5,4%                   | 8,6%                               |                                  |
| Kontakt mit dem Ärztlichen Bereitschaftsdienst       | 4.027         | 2.474                  | 1.553                              | <b>&lt;0,001<sup>a</sup></b>     |
| Gar nicht                                            | 81,8%         | 81,0%                  | 83,2%                              |                                  |
| 1x                                                   | 11,8%         | 12,8%                  | 10,3%                              |                                  |
| 2 – 3x                                               | 5,4%          | 5,7%                   | 4,9%                               |                                  |
| 4x und mehr                                          | 0,9%          | 0,5%                   | 1,6%                               |                                  |
| <i>Wenn ja, erforderliche Hilfe erhalten?</i>        | 586           | 377                    | 209                                | 0,078                            |
| Ja                                                   | 87,9%         | 89,7%                  | 84,7%                              | (0,073) <sup>b</sup>             |
| Nein                                                 | 12,1%         | 10,3%                  | 15,3%                              |                                  |
| Aufsuchen Notaufnahme                                | 4.037         | 2.481                  | 1.556                              | 0,167 <sup>a</sup>               |
| Gar nicht                                            | 72,5%         | 71,7%                  | 73,8%                              |                                  |
| 1x                                                   | 18,8%         | 19,4%                  | 17,9%                              |                                  |
| 2 – 3x                                               | 7,7%          | 8,1%                   | 7,1%                               |                                  |
| 4x und mehr                                          | 0,9%          | 0,8%                   | 1,2%                               |                                  |
| <i>Wenn ja, erforderliche Hilfe erhalten?</i>        | 1.026         | 652                    | 374                                | 0,360                            |
| Ja                                                   | 92,0%         | 91,3%                  | 93,3%                              | (0,242) <sup>b</sup>             |
| Nein                                                 | 8,0%          | 8,7%                   | 6,7%                               |                                  |
| <i>Aufsuchen Notaufnahme Eigeninitiative/ÜW/EW*?</i> | 1.026         | 652                    | 374                                | 0,147                            |
| Eigeninitiative                                      | 60,0%         | 58,6%                  | 62,6%                              | (0,311) <sup>b</sup>             |
| Anraten Bereitschaftsdienstpraxis                    | 9,0%          | 10,0%                  | 7,2%                               |                                  |
| Einweisung/Überweisung Haus-/Facharzt                | 16,7%         | 16,9%                  | 16,3%                              |                                  |
| nach Kontakt zur 112                                 | 14,7%         | 16,1%                  | 12,3%                              |                                  |
| sonstiges                                            | 3,2%          | 2,9%                   | 3,7%                               |                                  |
| Medizinische Hilfe bei Schlaganfall-Symptomen        | 4.042         | 2.483                  | 1.559                              | <b>&lt;0,001</b>                 |
| Hausarztpraxis                                       | 13,4%         | 15,7%                  | 9,6%                               | (0,116) <sup>b</sup>             |
| Ärztlicher Bereitschaftsdienst                       | 6,8%          | 6,8%                   | 6,6%                               |                                  |
| Krankenhaus-Notaufnahme                              | 15,2%         | 16,9%                  | 12,6%                              |                                  |
| Notrufnummer 112                                     | 63,6%         | 59,5%                  | 70,2%                              |                                  |
| Sonstiges                                            | 1,0%          | 1,1%                   | 1,0%                               |                                  |

|                                             |       |       |       |                              |
|---------------------------------------------|-------|-------|-------|------------------------------|
| Medizinische Hilfe bei Erkältungssymptomen  | 4.004 | 2.458 | 1.546 | <b>&lt;0,001</b>             |
| Ärztlicher Bereitschaftsdienst              | 75,1% | 72,7% | 79,1% | (0,157) <sup>b</sup>         |
| Krankenhaus-Notaufnahme                     | 9,9%  | 12,3% | 6,2%  |                              |
| Notrufnummer 112                            | 5,3%  | 7,2%  | 2,4%  |                              |
| Sonstiges                                   | 9,6%  | 7,9%  | 12,3% |                              |
| Mögliche Anfahrt Notfalleinrichtung (Dauer) | 3.993 | 2.453 | 1.540 | <b>&lt;0,001<sup>a</sup></b> |
| bis 15 Minuten                              | 32,0% | 34,3% | 28,2% |                              |
| bis 30 Minuten                              | 53,4% | 53,0% | 53,9% |                              |
| bis 45 Minuten                              | 7,2%  | 6,0%  | 9,2%  |                              |
| 45 Minuten und länger                       | 7,5%  | 6,7%  | 8,7%  |                              |
| Nutzung Telefon oder Video im Notfall       | 3.903 | 2.398 | 1.505 | 0,811                        |
| Ja                                          | 76,4% | 76,5% | 76,1% | (-0,004) <sup>c</sup>        |
| Nein                                        | 23,6% | 23,5% | 23,9% |                              |
| Nummer Ärztlicher Bereitschaftsdienst       | 4.073 | 2.509 | 1.564 | <b>&lt;0,001<sup>a</sup></b> |
| Keine Angaben                               | 45,9% | 54,6% | 31,9% |                              |
| Nummer falsch angegeben                     | 19,0% | 22,5% | 13,4% |                              |
| Nummer korrekt angegeben                    | 35,1% | 22,9% | 54,7% |                              |

---

\*ÜW = Überweisung, EW = Einweisung

<sup>a</sup> Spearman Korrelationskoeffizient

<sup>b</sup> Kramer Phi Koeffizient
